# Supplementary material for: A Descriptive Study on the Characteristics of Cardiomyopathy Patients with Acid α-Glucosidase (GAA) Pseudo-deficiency Allele and the Clinical Significance in a Tertiary Heart Centre in Malaysia
Source: Research Square preprint supplement (doi:10.21203/rs.3.rs-4135323/v1), 2024-04-04
Supplement: Supplementary file 1 [file 6f3850990e327253ea3a7f1a.xlsx]

## Sheet: Sheet1
Subject	Name	IC Number	Age	Gender	Ethnicity (1 = Malay, 2 = Chinese, 3 = Indigenous, 4 = Foreigner)	CMP Phenotype (1= HCM, 2 = ATTR, 3 = HPT, 4 = Fabry, 5 = Familial DCM)	CPK (U/L) (29-168)	Enzyme level (umol/L/H), cut off > 2.0 tandem mass spectometry	FEV1 (L)	FEV1 (%)	FVC (L)	FVC (%)	DLCO	DLCO (%)	MRC Sum Score	NYHA	Ptosis	Bulbar	Scapular	Scoliosis	Lordosis	Atrophy Shoulder/ Trunk/ Pelvic girdle
Positive GAA Pseudodeficiency Allele
S1	Ernie Dominic		17	2	3
S2	Fauzi Abdullah		40	1	1		156	3.9	1.39	44	2.55	68	999	999	130	1	2	2	2	2	2	2
S3	Heligon Nakur		79	1	3	2	999	999	999	999	999	999	999	999	999	1	999	999	999	999	999	999
S4	Jee Shak Chin		46	2	2	5	81	6.1	2.34	103	2.8	103	3.96	62	130	1	2	2	2	2	2	2
S5	Ling Hu Fa	760420135262	46	2	2	4	39	9.2	1.82	76	2.17	76	4.57	68	104	2	2	2	2	2	2	2
S6	Marvline Anak Bare		39	2	3
S7	Radin Nurul Fatihiah Radiq Suleiman	920323146672	30	2	1	1	84	6.5	2.22	87	2.64	91	5.41	81	130	1	2	2	2	2	2	2
S8	Tang Hie Ping	680315135340	54	2	2	1	103	3.8	1.9	85	2.44	90	4.99	76	130	1	2	2	2	2	2	2
Uncertain GAA Pseudodeficiency Allele
S1	Awg Salleh Awg Rosli	390830135067	83	1	1	2	170	4.3	999	999	999	999	999	999	130	1	2	2	2	2	2	2
S2	Maximilian Anak Usah		36	1	3
S3	Mohd Hasmadi Bin Mat		43	1	1
S4	Mohd Nazif Che Dom	810927135707	41	1	1	1	297	6	2.72	83	3.32	85	6.11	69	130	1	2	2	2	2	2	2
S5	Norleha Gawan	640510136764	58	2	4	1	204	4.7	2.15	100	2.53	96	5.53	85	130	1	2	2	2	2	2	2
S6	Radin Ali Radin Suleiman		61	1	1
S7	Radin Nurulfathiah Radin Suleiman		29	2	1
S8	Radin Nurul Nadiah		34	2	1
S9	Radin Nurulhuda Radin Suleiman		36	2	1
S10	Zaidi		62	1	1
Negative GAA Pseudodeficiency Allele
S1	Ching Kiam Chai		47	1	2	3	155	3.2	3.07	112	3.61	104	999	999	130	1	2	2	2	2	2	2
S2	Jies Ahoo	490107135322	73	2	3	3	68	4.9	0.66	40	1.64	81	3.45	62	130	1	2	2	2	2	2	2

## Sheet: Sheet2
Subject	Name	IC Number	Age	Gender	Ethnicity (1 = Malay, 2 = Chinese, 3 = Indigenous, 4 = Foreigner)	CMP Phenotype (1= HCM, 2 = ATTR, 3 = HPT, 4 = Fabry, 5 = Familial DCM)	CPK (U/L) (29-168)	Enzyme level (umol/L/H), cut off > 2.0 tandem mass spectometry	FEV1 (%)	FVC (%)	DLCO (%)	MRC Sum Score	NYHA	Ptosis	Bulbar	Scapular	Scoliosis	Lordosis	Atrophy Shoulder/ Trunk/ Pelvic girdle
S2	Fauzi Abdullah		40	1	1		156	3.9	44	68	999	130	1	2	2	2	2	2	2
S3	Heligon Nakur		79	1	3	2	999	999	999	999	999	999	1	999	999	999	999	999	999
S4	Jee Shak Chin		46	2	2	5	81	6.1	103	103	62	130	1	2	2	2	2	2	2
S5	Ling Hu Fa	760420135262	46	2	2	4	39	9.2	76	76	68	104	2	2	2	2	2	2	2
S7	Radin Nurul Fatihiah Radiq Suleiman	920323146672	30	2	1	1	84	6.5	87	91	81	130	1	2	2	2	2	2	2
S8	Tang Hie Ping	680315135340	54	2	2	1	103	3.8	85	90	76	130	1	2	2	2	2	2	2
